# Supplementary material
Source: PubMed Central journal article supplement (PMC3969021)
Supplement: NIHMS563140-supplement-Supplemental_Material.pdf [file NIHMS563140-supplement-Supplemental_Material.pdf]

## Supplementary Materials for

### Convergence of G Protein–Coupled Receptor and S-Nitrosylation Signaling Determines the Outcome to Cardiac Ischemic Injury

Z. Maggie Huang, Erhe Gao, Fabio Vasconcelos Fonseca, Hiroki Hayashi, Xiyang Shang, Nicholas E. Hoffman, J. Kurt Chuprun, Xufan Tian, Doug G. Tilley, Muniswamy Madesh, David J. Lefer, Jonathan S. Stamler, Walter J. Koch\*

\*Corresponding author. E-mail: walter.koch@temple.edu

Published 29 October 2013, *Sci. Signal.* **6**, ra95 (2013)

DOI: 10.1126/scisignal.2004225

#### The PDF file includes:

- Fig. S1. Ischemia/reperfusion injury in GRK2 Tg or  $\beta$ ARKct Tg mice in which eNOS abundance was genetically manipulated.
- Fig. S2. Generation of GRK2-C340S knock-in mouse and real-time PCR and Western blot measurements of the abundance of  $\beta$ AR signaling pathway components in wild-type and GRK2-C340S knock-in mouse hearts.
- Fig. S3. Echocardiography measurements in wild-type and GRK2-C340S mice.
- Fig. S4. Biochemical characteristics of GRK2 in wild-type and GRK2-C340S knock-in mouse hearts.
- Fig. S5. Decline in the in vivo LV contractility of wild-type and GRK2-C340S mice during isoproterenol infusion.
- Fig. S6. Characteristics of ischemia/reperfusion injury in wild-type and GRK2-C340S knock-in mice after GSNO treatment.
- Fig. S7. Characteristics of ischemia/reperfusion injury in eNOS/GRK2-C340S knock-in mice and wild-type mice acutely infused with GSNO.
- Fig. S8. Activation of the mitogen-activated protein kinase p42/p44 ERK in NRVMs treated with isoproterenol or isoproterenol and EGFR inhibitor.

Supplementary Figure 1

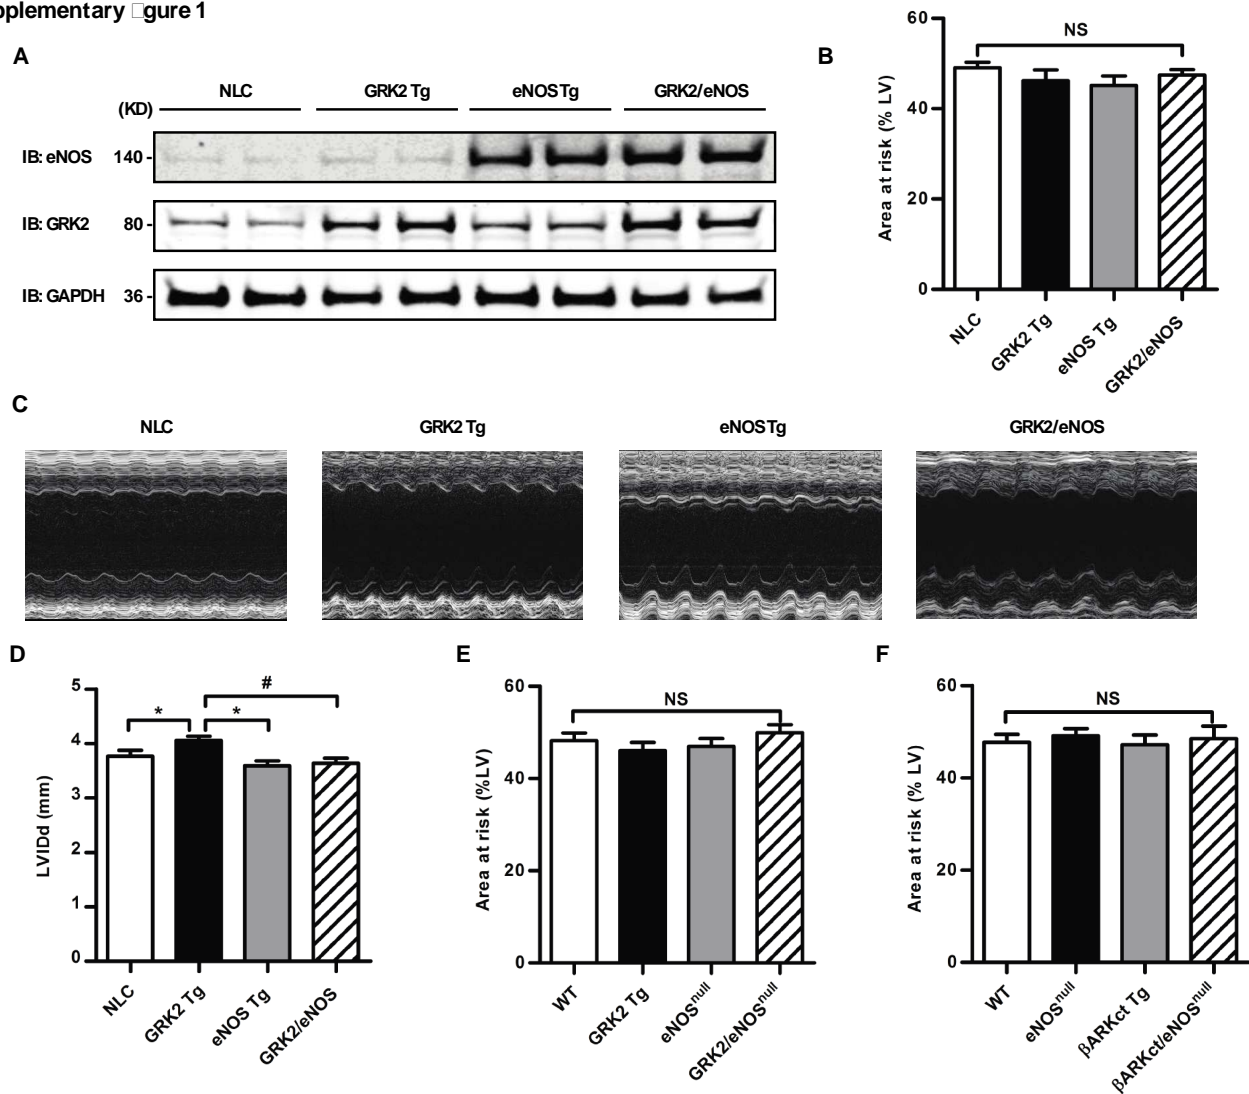

**Supplementary Figure 1.** Ischemia/reperfusion injury in GRK2 Tg or  $\beta$ ARKct Tg mice in which eNOS abundance was genetically manipulated. **A**, Representative Western blots showing the abundance of GRK2 and eNOS in non-transgenic littermate control (NLC), GRK2 Tg, eNOS Tg and GRK2/eNOS mouse hearts. GAPDH was used as a loading control. A Western blot representative of 4 (8 mice in each group) independent experiments is shown. **B**, LV ischemic AAR for NLC, GRK2 Tg, eNOS Tg and GRK2/eNOS mice following ischemia/reperfusion (n=8-12 mice/group). **C**, Representative M-Mode echocardiography images post-ischemia/reperfusion in NLC, GRK2 Tg, eNOS Tg and GRK2/eNOS mice. **D**, Left ventricular internal dimension during diastole (LVIDd) evaluated by echocardiography in NLC, GRK2 Tg, eNOS Tg and GRK2/eNOS mice. \*,  $P < 0.05$ , #,  $P < 0.01$  (ANOVA, n = 8-

12mice/group). **E**, LV ischemic AAR for wild-type control, GRK2 Tg, eNOS<sup>null</sup> and GRK2/eNOS<sup>null</sup> mice following ischemia/reperfusion (n=10-12 mice/group). **F**, LV ischemic AAR for WT, eNOS<sup>null</sup>,  $\beta$ ARKct Tg and  $\beta$ ARKct/eNOS<sup>null</sup> mice following ischemia/reperfusion (n=6-8 mice/group).

Supplementary Figure 2

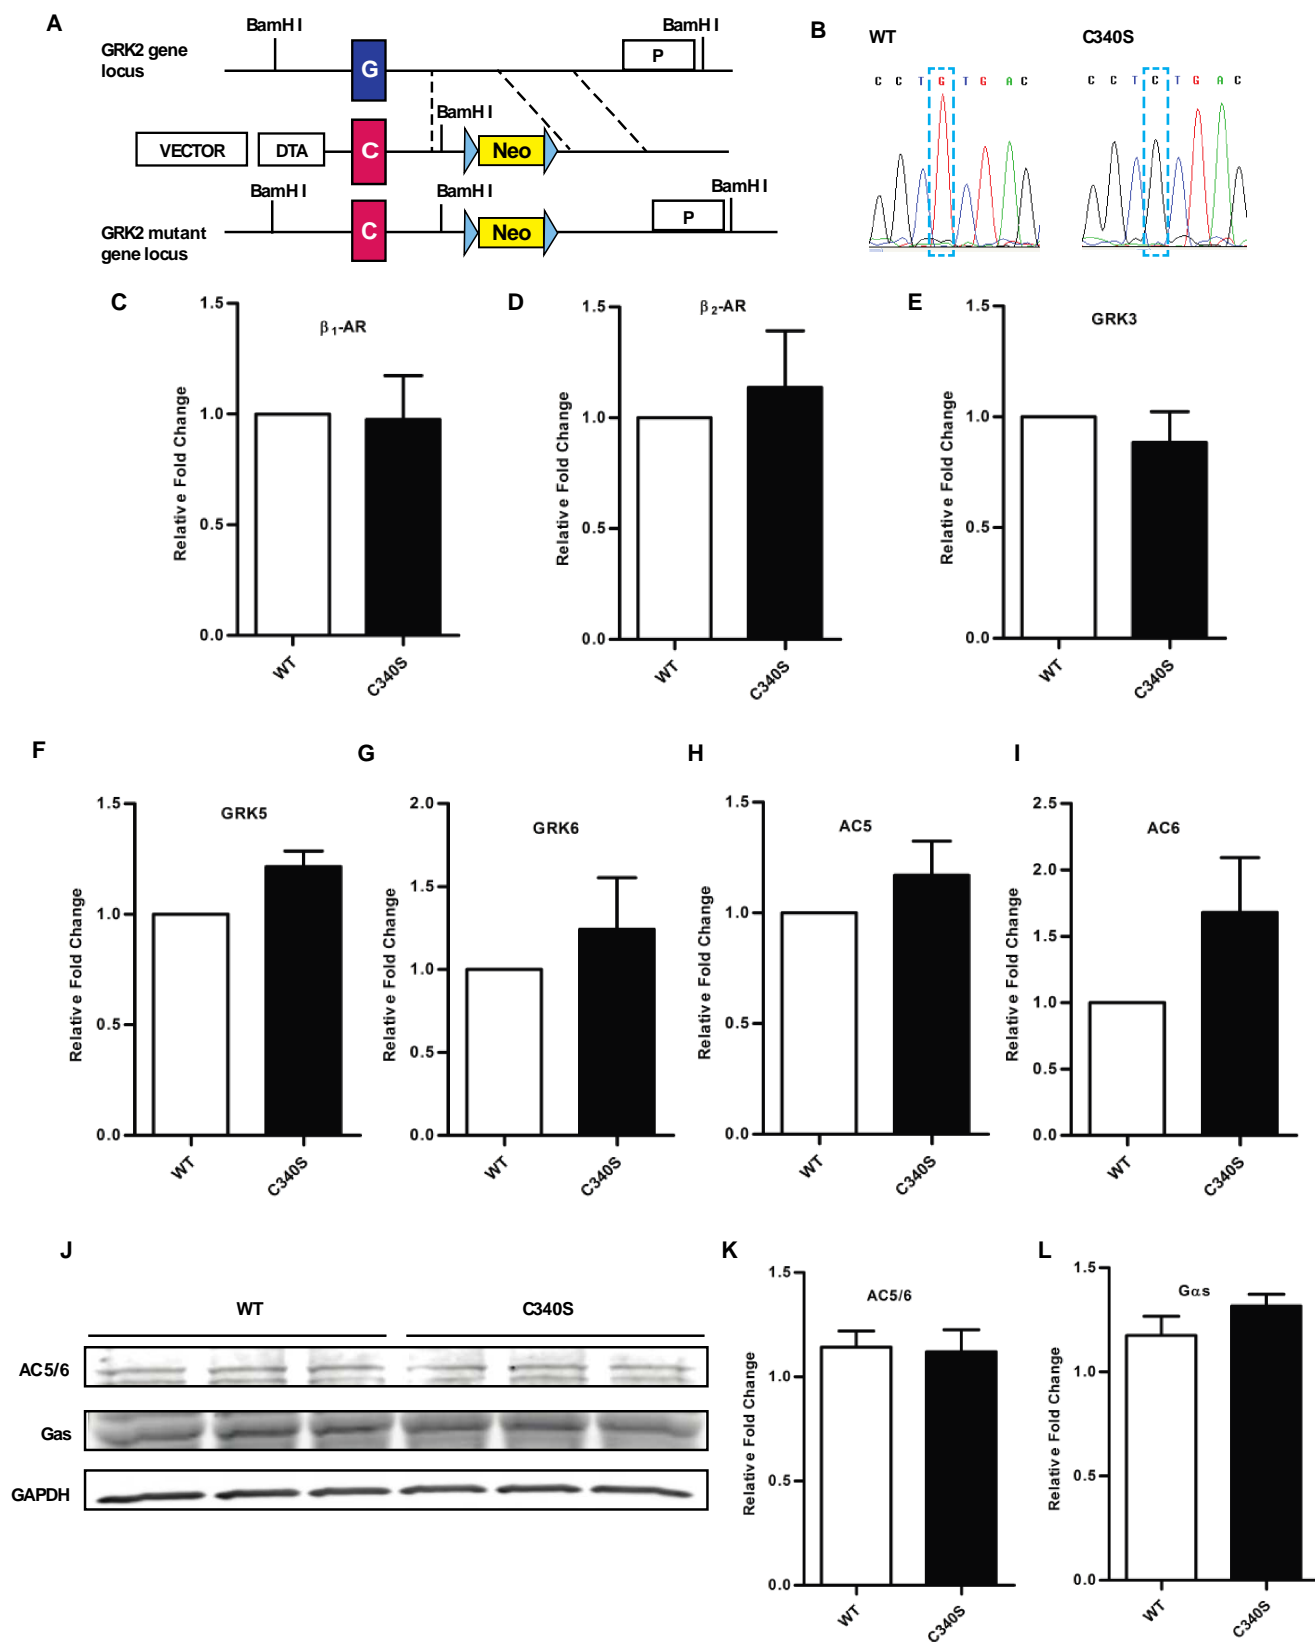

**Supplementary Figure 2.** Generation of GRK2-C340S knock-in mouse and real-time PCR and Western blot measurements of the abundance of  $\beta$ AR signaling pathway components in wild-type and GRK2-C340S knock-in mouse hearts. **A**, Map of the WT GRK2 locus, the targeting vector, and the C340S GRK2 locus after homologous recombination. **B**, Sequencing of PCR screening products showing mutation of G in WT to C in the mutant conferring the Cys to Ser replacement in GRK2 residue 340. **C-I**, Quantitative RT-PCR to measure the relative abundance of mRNAs encoding  $\beta_1$ AR,  $\beta_2$ AR, GRK3, GRK5, GRK6, AC5, and AC6 in 2 month old wild-type and GRK2-C340S knock-in mouse hearts. (NS, n=4 mice/group, Mann-Whitney test). **J**, The abundance of AC5/6 and  $G\alpha_s$  was tested by Western blot in 2 month old WT and GRK2-C340S knock-in mouse hearts. Western blot representative of 3 (5 mice in each group) independent experiments is shown. **K-L**, Quantification of the blots described in (J) (NS, n=5 mice/group, Mann-Whitney test).

Supplementary Figure 3

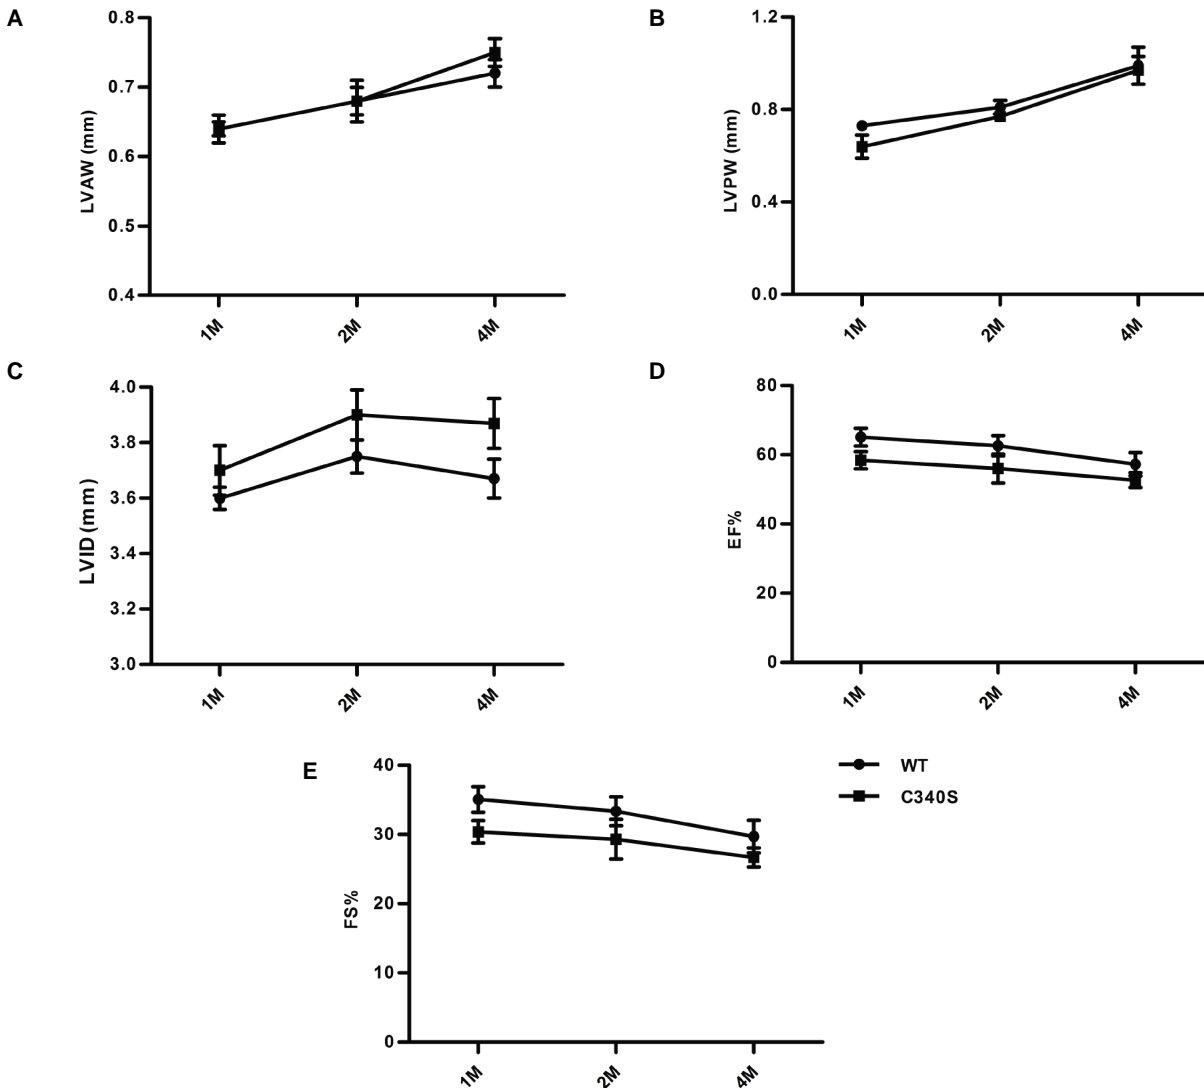

**Supplementary Figure 3.** Echocardiography measurements in wild-type and GRK2-C340S mice. Measurements were determined at 1, 2, and 4 months of age (NS, n=5-7 mice/group, Mann-Whitney test). Values for (A) LV anterior wall thickness (LVAW), (B) LV posterior wall thickness (LVPW), (C) LV internal diameter (LVID), (D) ejection fraction (EF%), (E) fractional shortening (FS%) are shown.

Supplementary Figure 4

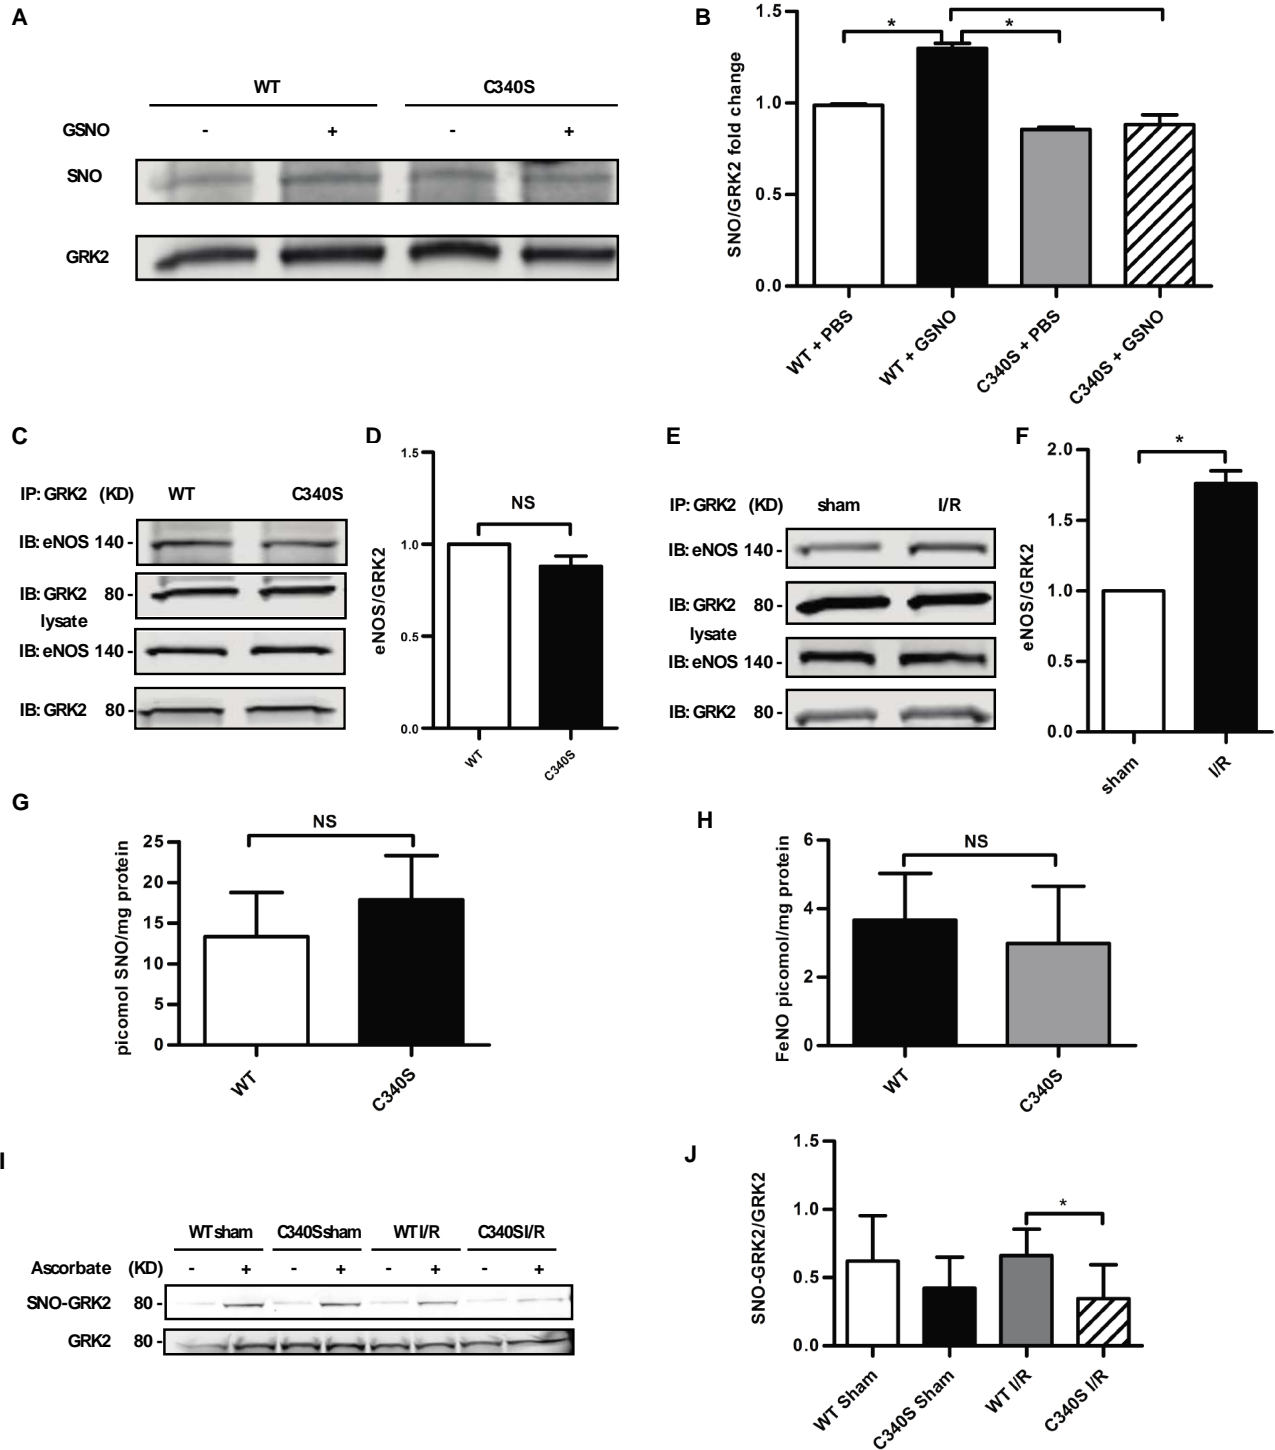

**Supplementary Figure 4.** Biochemical characteristics of GRK2 in wild-type and GRK2-C340S knock-in mouse hearts. **A**, Representative Western blot of cardiac GRK2 immunoprecipitations showing S-nitrosylated GRK2 using an SNO-Cys specific antibody following 7 days of GSNO infusion. **A**

representative of 3 independent experiments is shown. **B**, Relative change of SNO-GRK2/GRK2 ratio in WT or C340S mouse hearts after 7 days of PBS or GSNO infusions. \*,  $P < 0.001$  (Kruskal-Wallis test,  $n = 4$  mice/group). **C**, Representative Western blot of cardiac GRK2 and eNOS immunoprecipitations in WT and GRK2-C340S mouse hearts. **D**, Quantification of the amount of cardiac eNOS immunoprecipitated by GRK2 in WT mice and GRK2-C340S knock-in mice with eNOS/GRK2 (mean $\pm$ SEM) values shown. (Mann-Whitney test,  $n = 3$  mice/group). **E**, Representative Western blot of cardiac GRK2 and eNOS immunoprecipitations in sham or ischemia/reperfusion-treated GRK2-C340S mouse hearts. **F**, Quantification of the amount of cardiac eNOS immunoprecipitated in GRK2-C340S mice by GRK2 in sham treated and ischemia/reperfusion-treated mice with eNOS/GRK2 (mean $\pm$ SEM) values shown. \*,  $P < 0.05$  (Mann-Whitney test,  $n = 3$  mice/group). **G-H**, Global S-nitrosothiol abundances in WT and GRK2-C340S hearts under basal conditions (t-test,  $n = 4$  mice/group). **I**, Representative Western blot of cardiac S-nitrosylated GRK2 using SNO-RAC assay following sham or ischemia/reperfusion treatment in both wild-type and GRK2-C340S knock-in mice. **J**, Relative change of SNO-GRK2/GRK2 ratio in WT or C340S mouse hearts with sham or ischemia/reperfusion treatment. \*,  $P < 0.05$  ( $n = 6$  mice/group, Mann-Whitney test).



Supplementary Figure 5

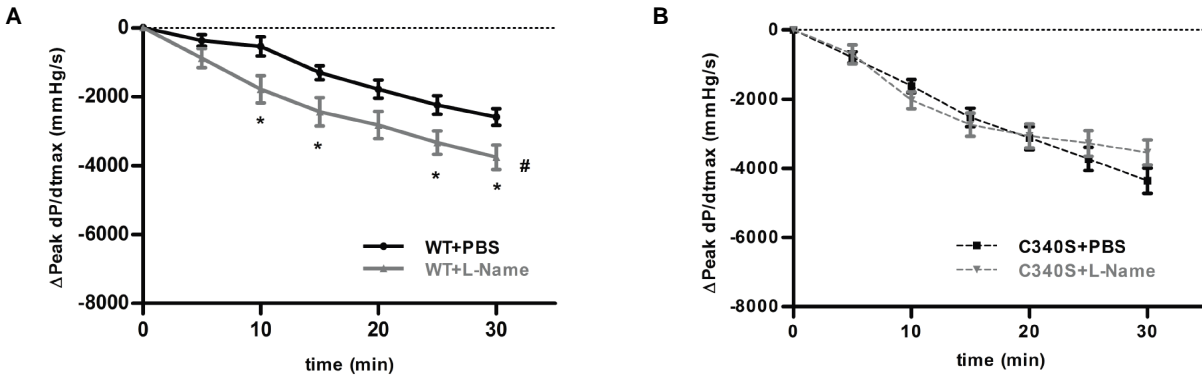

**Supplementary Figure 5.** Decline in the in vivo LV contractility of wild-type and GRK2-C340S mice during isoproterenol infusion. LV contractility, as assessed by the change in LV peak  $dP/dt_{max}$ , was determined in wild-type and GRK2-C340S mice during an infusion of ISO maintained over 30 min, with or without L-NAME pretreatment. **A**, Decline of contractility in wild-type mice with and without L-NAME pretreatment. \*,  $P < 0.05$ , #,  $P < 0.01$  WT with L-NAME curve vs WT with PBS (two way ANOVA,  $n = 7$  mice/group). **B**, Decline of contractility in GRK2-C340S knock-in mice with and without L-NAME pretreatment (two way ANOVA,  $n = 7$  mice/group).

Supplementary Figure 6

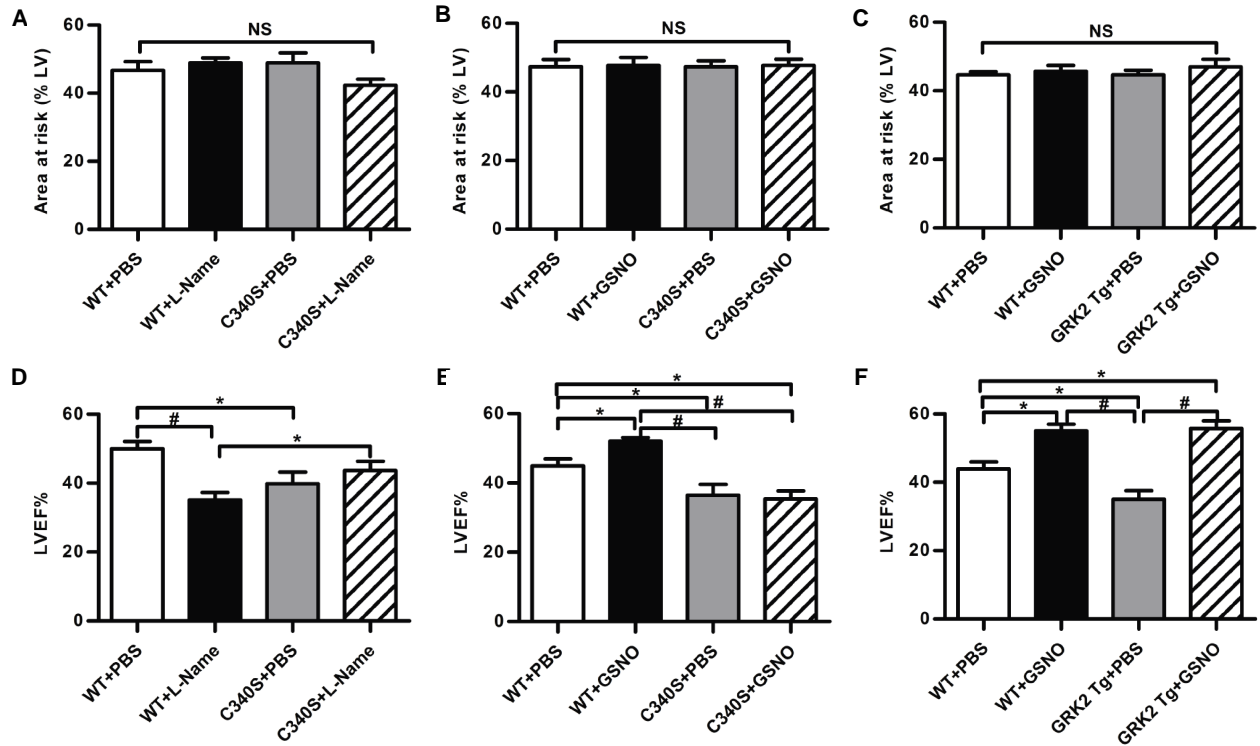

**Supplementary Figure 6.** Characteristics of ischemia/reperfusion injury in wild-type and GRK2-C340S knock-in mice after GSNO treatment. **A**, LV ischemic AAR for wild-type and GRK2-C340S mice with or without L-NAME pretreatment (n= 6-9 mice/group). **B**, LV ischemic AAR for wild-type and GRK2-C340S mice with or without GSNO pretreatment (n=6-7 mice /group). **C**, LV ischemic AAR for wild-type and GRK2 Tg mice with or without GSNO pretreatment (n=6 mice/group). **D**, LVEF% determined by echocardiography in wild-type and GRK2-C340S mice with and without L-NAME treatment following ischemia/reperfusion injury. \*,  $P < 0.05$ , #,  $P < 0.01$  (ANOVA, n=6-9 mice/group). **E**, LVEF% in post- ischemia/reperfusion wild-type and GRK2-C340S mice with or without a GSNO infusion. \*,  $P < 0.05$ , #,  $P < 0.001$  (ANOVA, n=6-7 mice/group). **F**, LVEF% in post-ischemia/reperfusion wild-type and GRK2 Tg mice with or without a GSNO infusion. \*,  $P < 0.01$ , #,  $P < 0.001$  (ANOVA, n=6 mice/group).

Supplementary Figure 7

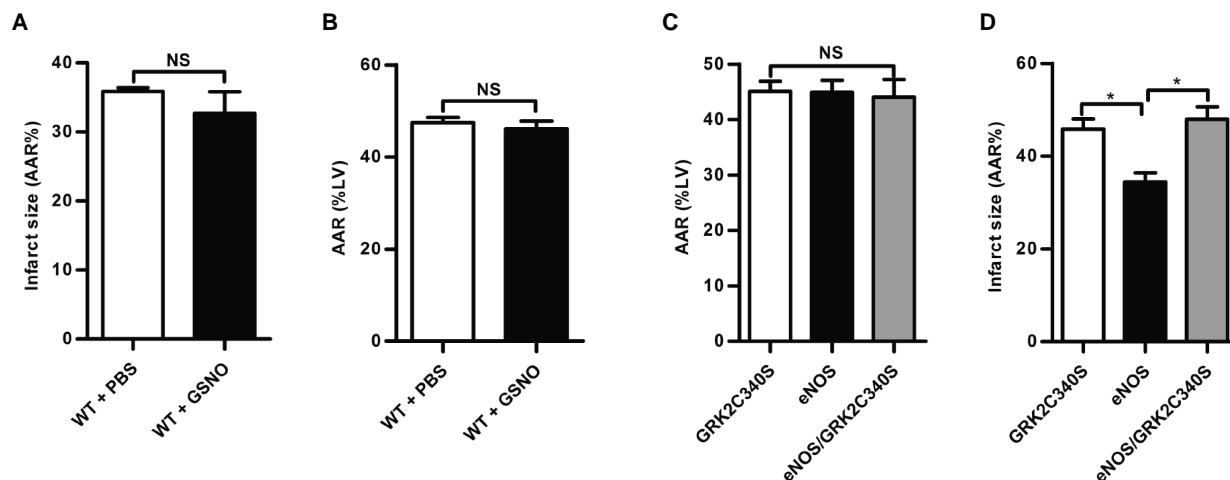

**Supplementary Figure 7.** Characteristics of ischemia/reperfusion injury in eNOS/GRK2-C340S knock-in mice and wild-type mice acutely infused with GSNO. **A**, LV infarct size for GRK2-C340S, eNOS Tg, and eNOS/GRK2-C340S mice. \*,  $P < 0.05$  (ANOVA,  $n = 6-9$  mice/group). **B**, LV ischemic AAR for GRK2-C340S, eNOS Tg, and eNOS/GRK2-C340S knock-in mice (ANOVA,  $n = 6-9$  mice/group). **C**, LV infarct size for wild-type mice with or without 24 hrs of GSNO pretreatment (ANOVA,  $n = 6-8$  mice/group). **D**, LV ischemic AAR for WT mice with or without 24 hours of GSNO pretreatment (ANOVA,  $n = 6-8$  mice/group).

Supplementary Figure 8

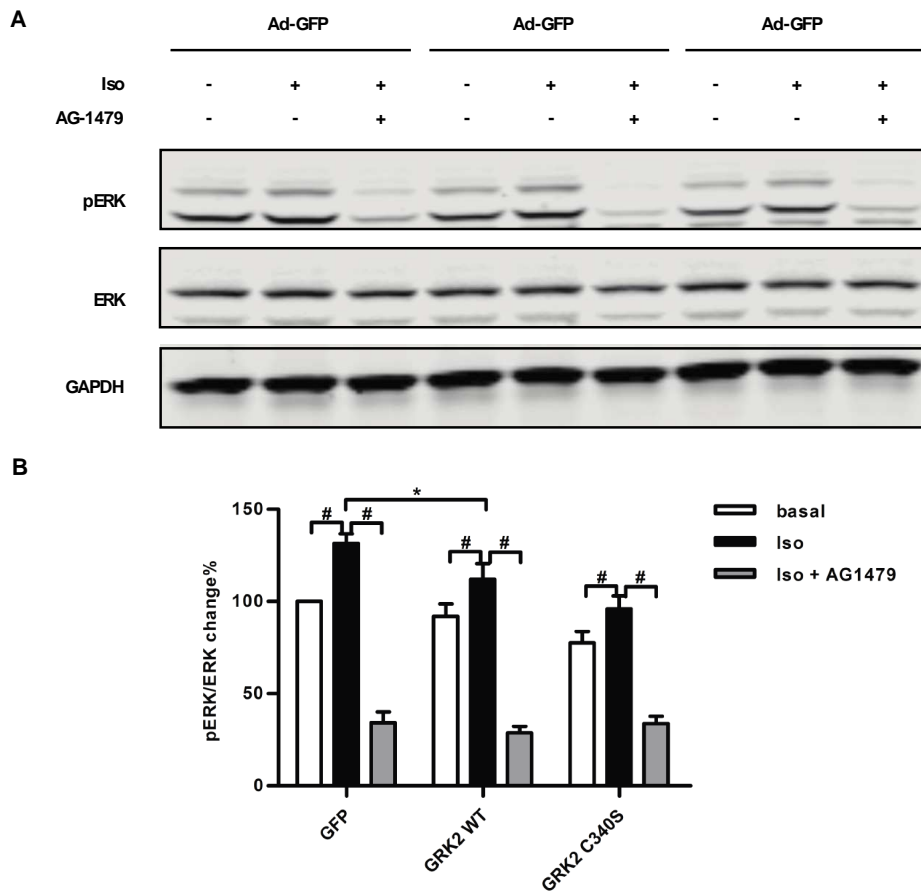

**Supplementary Figure 8.** Activation of the mitogen-activated protein kinase p42/p44 ERK in NRVMs treated with isoproterenol or isoproterenol and EGFR inhibitor. Activation of p42/p44 ERK was assessed by phosphorylation status in NRVMs treated with Ad-GFP, Ad-GRK2 or Ad-GRK2-C340S after stimulation with isoproterenol (ISO) or ISO and the EGFR inhibitor, AG1479. Mean±SEM from 9 individual experiments in which myocyte lysates were prepared after ISO treatment and Western blotted for pERK and total ERK. A, Representative Western blot. B, The pERK/total ERK ratio is normalized to that of GFP-treated control myocytes at baseline. \*,  $P < 0.05$ , #,  $P < 0.01$  (two way ANOVA,  $n=9$ ).
